# Supplementary material
Source: JCI journal article supplement (doi:10.1172/jci.insight.204852)

Full unedited blot (FUB) for Supplemental Figure 4

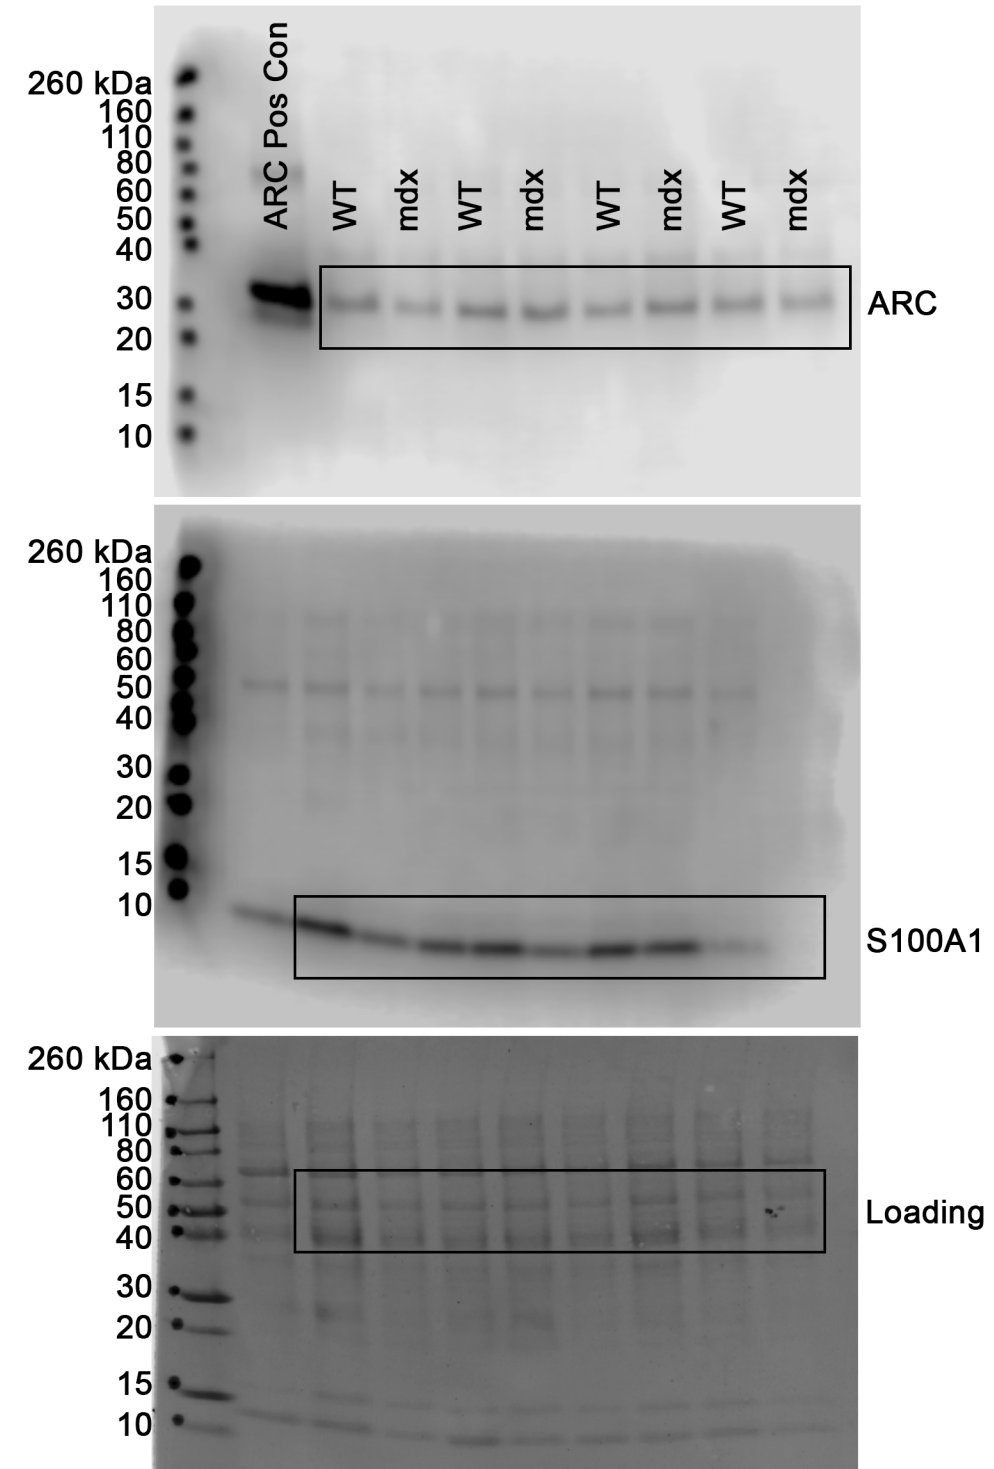

FUB for Figure 4B

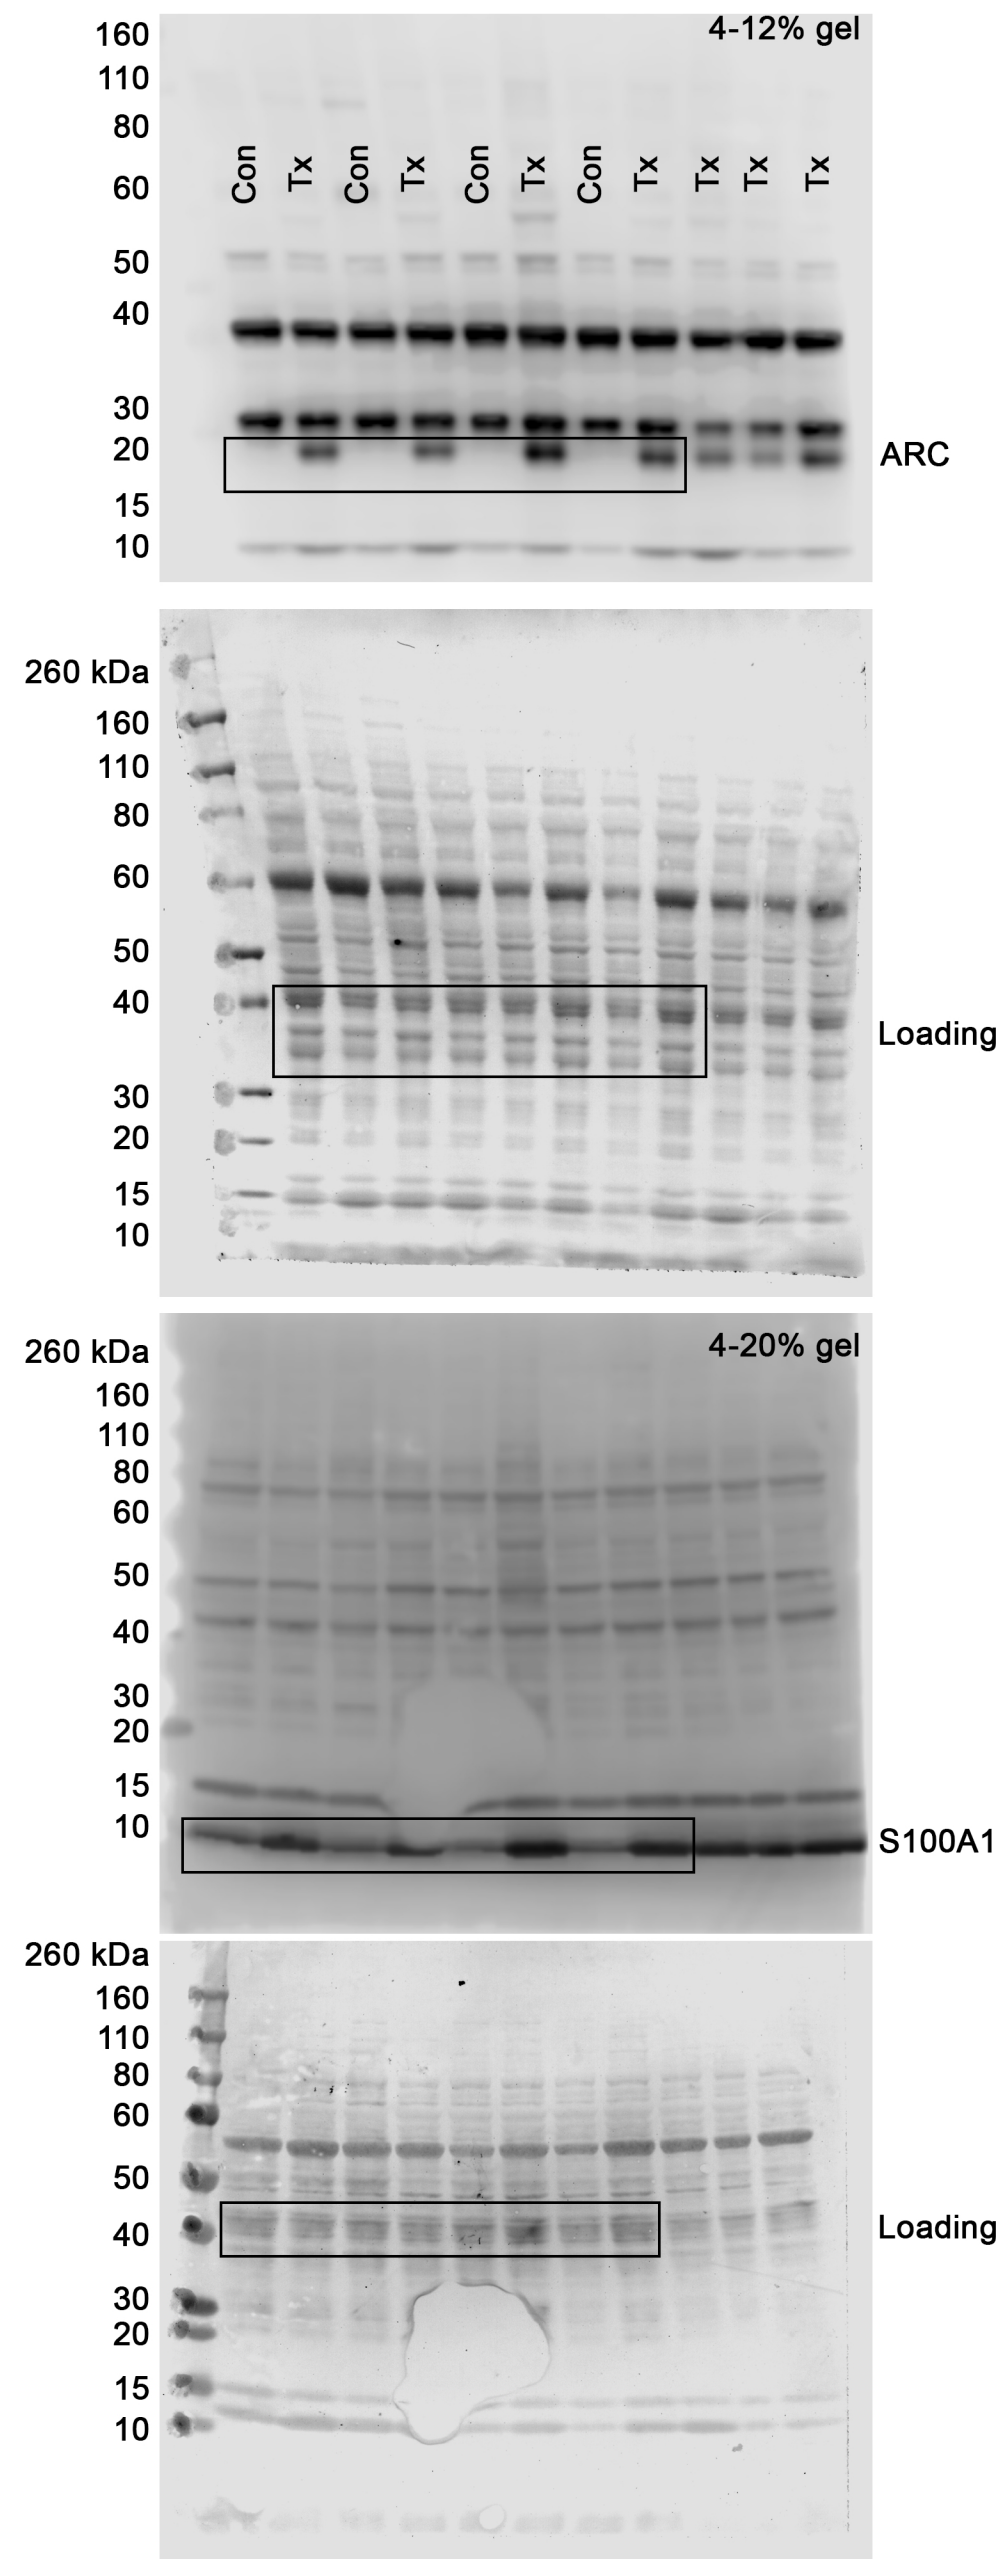

FUB for Supplemental Figure 6E

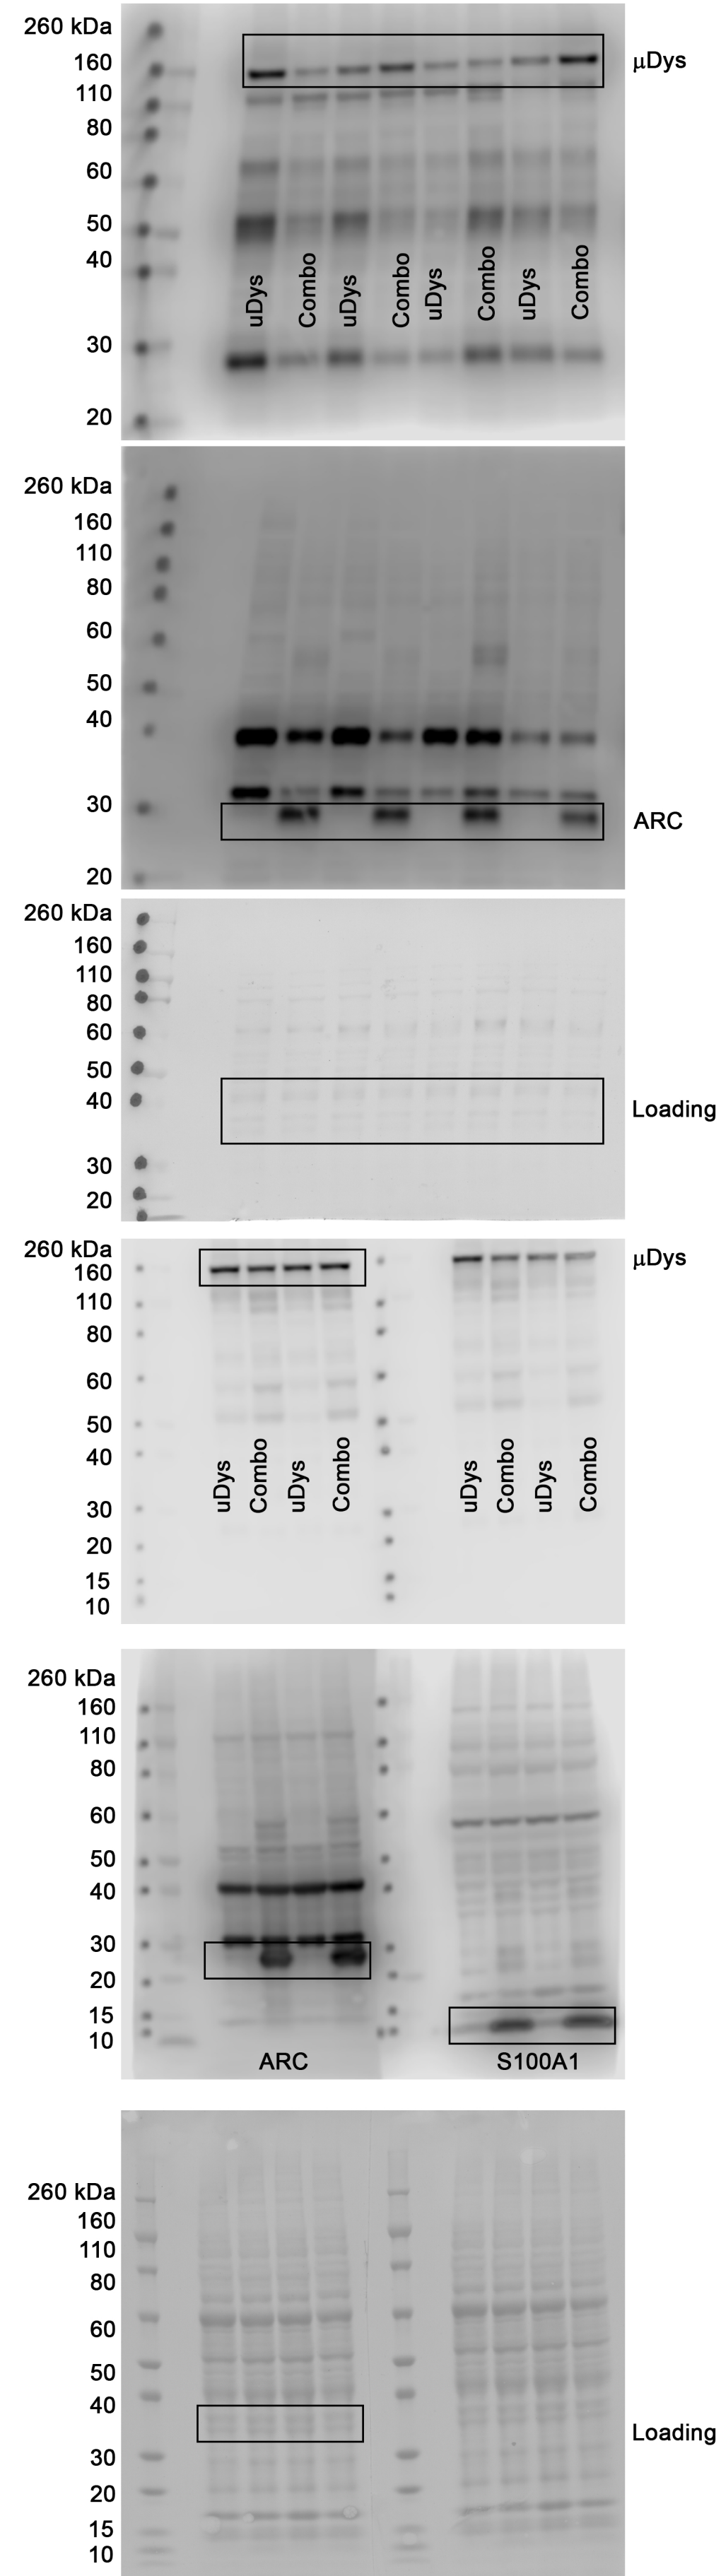

FUB for Supplemental Figure 7B Diaphragm

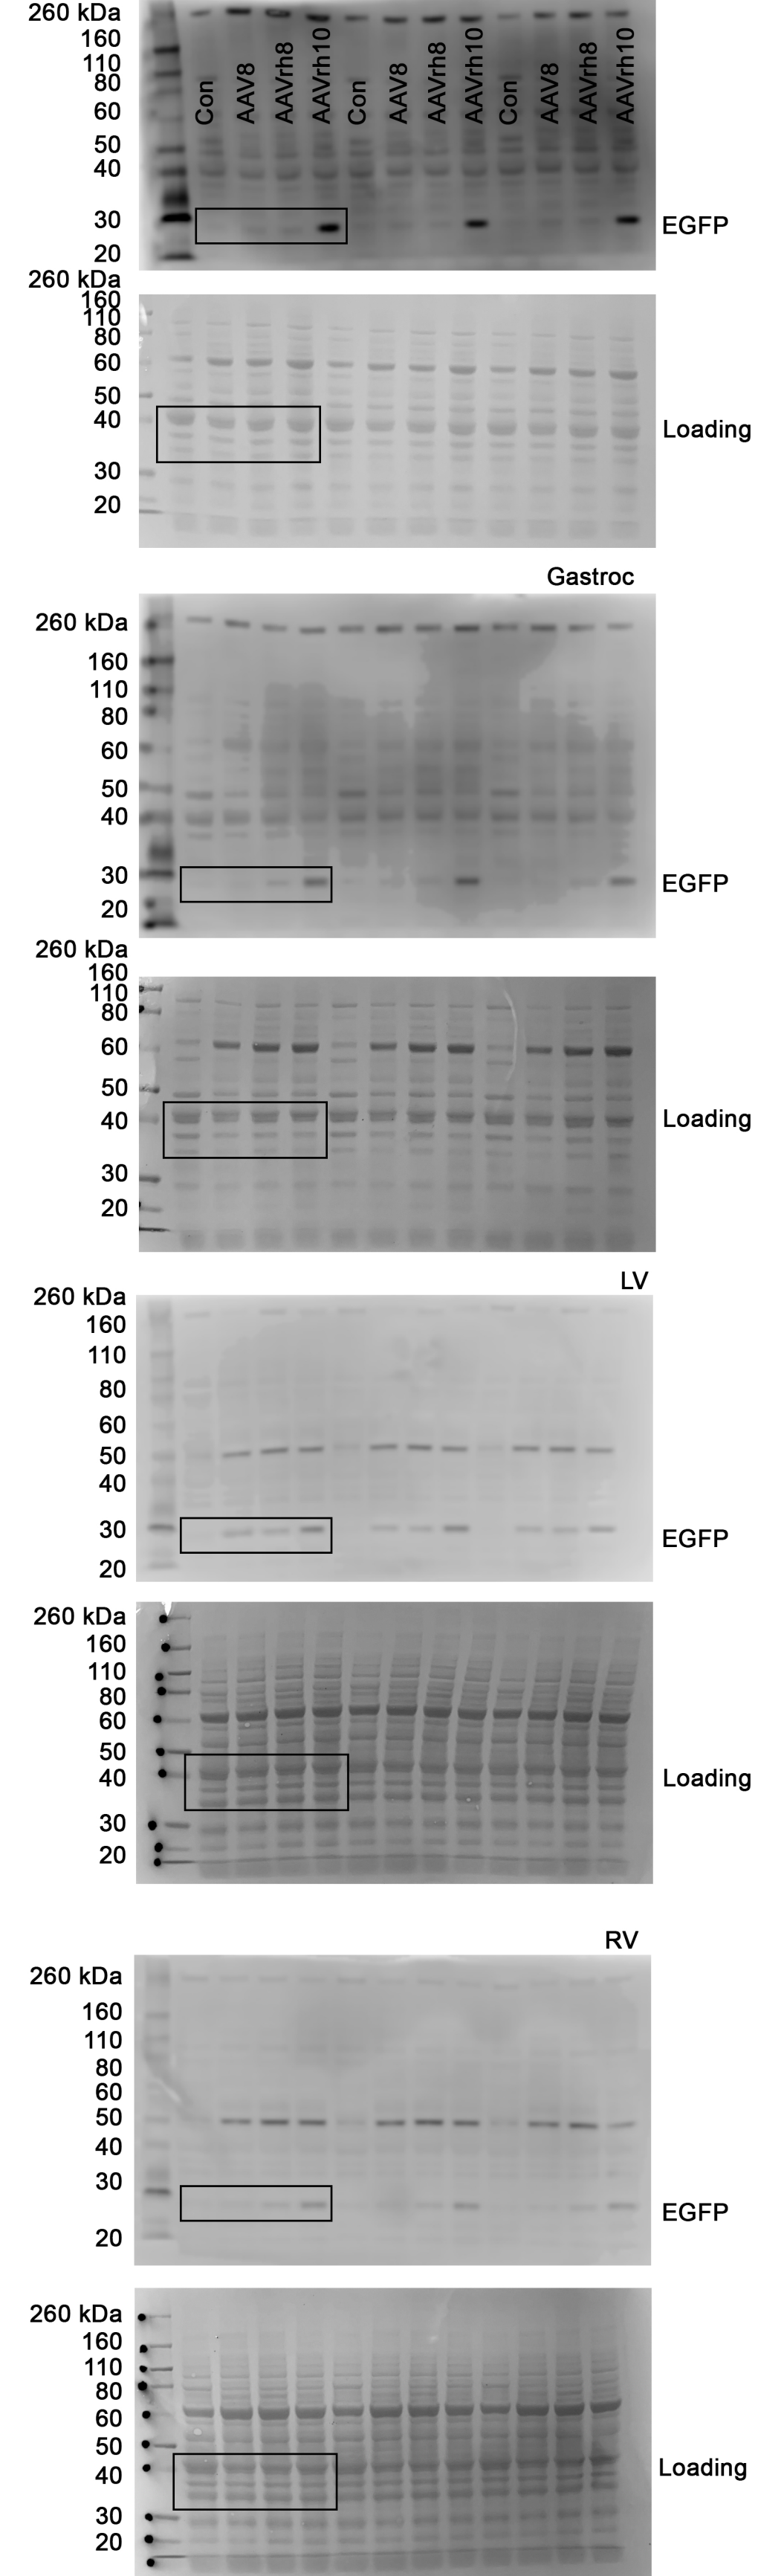

Gastroc

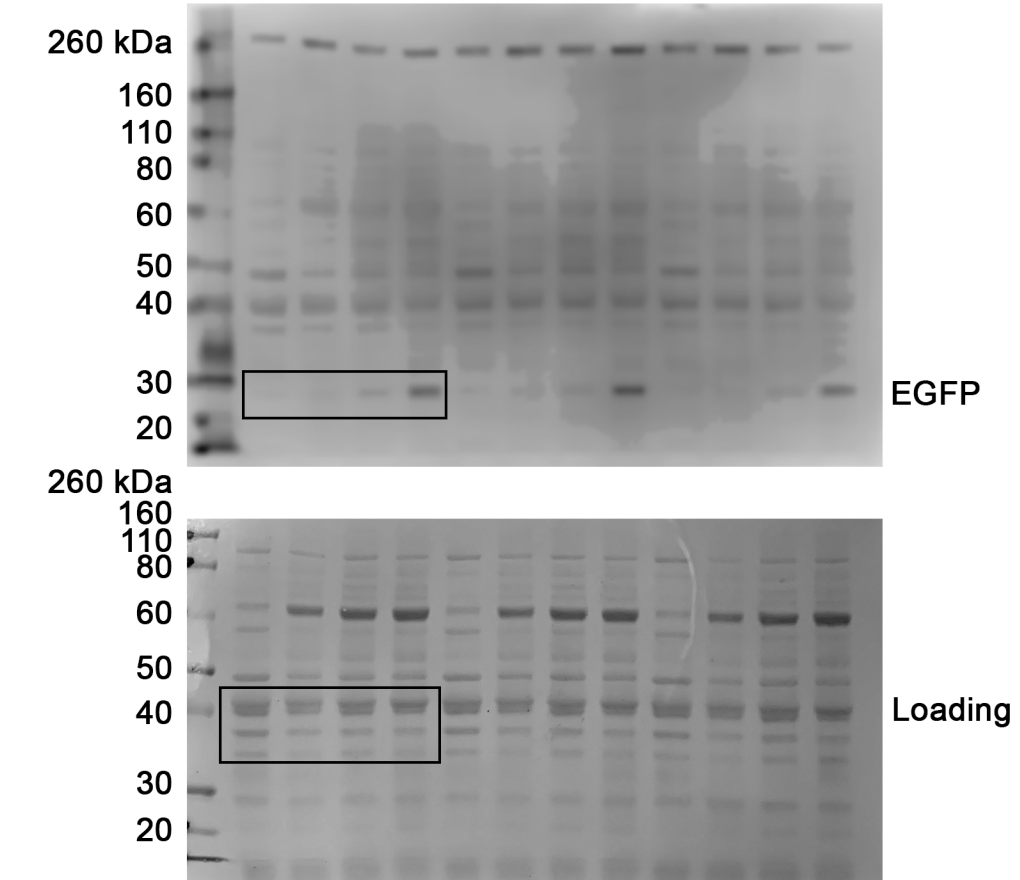

LV

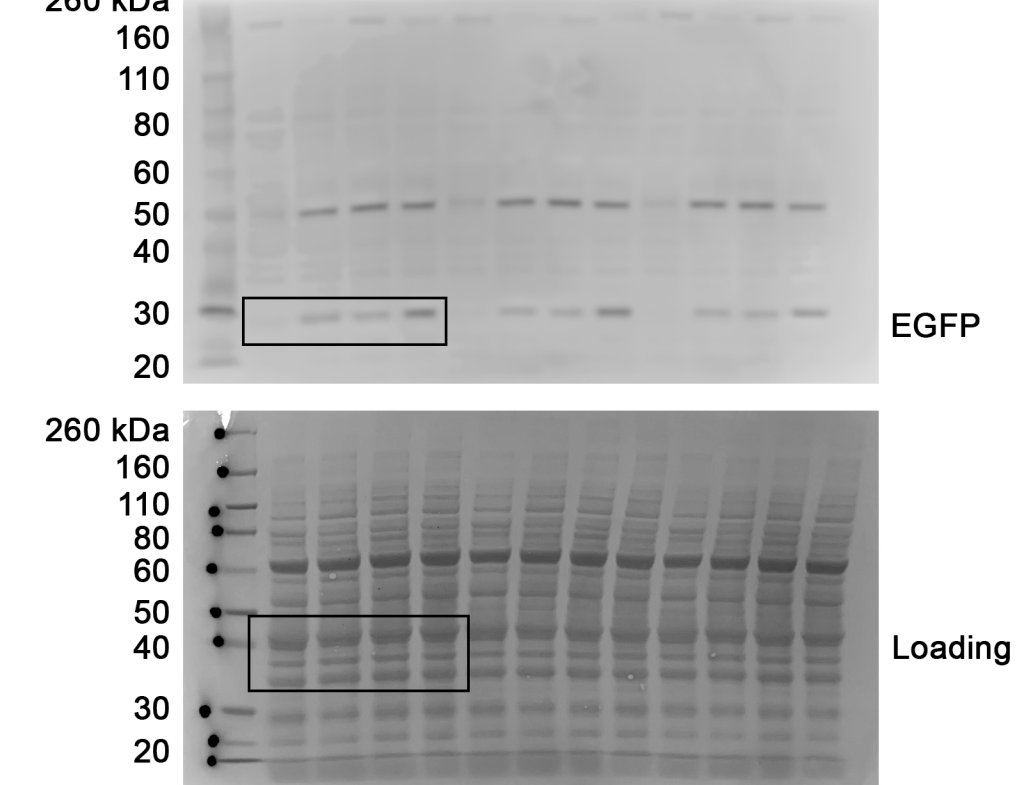

RV

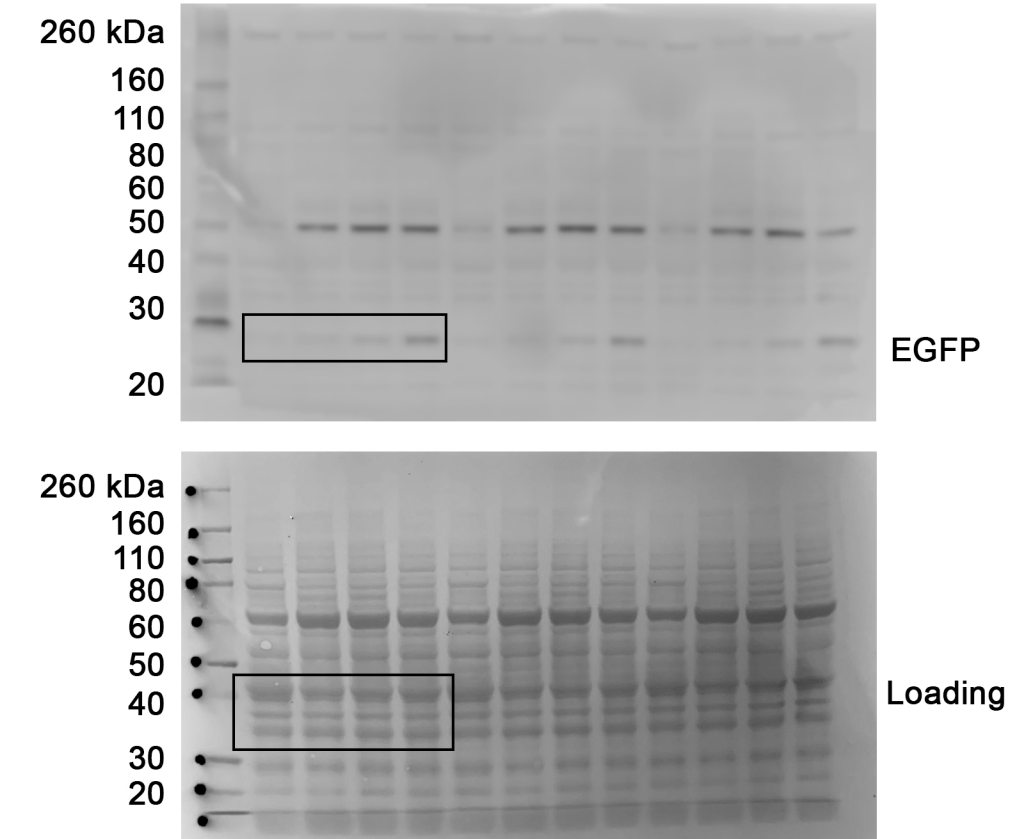

Supplement: sd2 [file 2]
